# Supplementary material for: Increasing trends in incidence of preterm birth among 2.5 million newborns in Guangzhou, China, 2001 to 2016: an age-period-cohort analysis
Source: Springer Nature journal article supplement (doi:10.1186/s12889-020-09739-6), 2020-11-04
Supplement: MOESM1 [file 18554868]

**Supplementary Table 1** Maternal and newborn characteristics by parity among singleton live births in Guangzhou, China from 2001 to 2016

| Characteristics                | All mothers |      | Primiparous mothers |      | Multiparous mothers |      |
|--------------------------------|-------------|------|---------------------|------|---------------------|------|
|                                | N           | %    | N                   | %    | N                   | %    |
| Gestation age of birth (weeks) |             |      |                     |      |                     |      |
| 20-31                          | 12,863      | 0.5  | 7226                | 0.5  | 5637                | 0.6  |
| 32-34                          | 33,167      | 1.3  | 19,671              | 1.2  | 13,496              | 1.4  |
| 35-36                          | 94,974      | 3.8  | 59,239              | 3.8  | 35,735              | 3.7  |
| ≥37                            | 2,393,996   | 94.4 | 1,479,856           | 94.5 | 914,140             | 94.3 |
| Maternal age (years)           |             |      |                     |      |                     |      |
| 15-19                          | 73,908      | 2.9  | 67,163              | 4.3  | 6745                | 0.7  |
| 20-23                          | 464,914     | 18.3 | 379,990             | 24.3 | 84,924              | 8.8  |
| 24-27                          | 828,230     | 32.7 | 583,480             | 37.3 | 244,750             | 25.3 |
| 28-31                          | 698,326     | 27.6 | 386,939             | 24.7 | 311,387             | 32.1 |
| 32-35                          | 323,845     | 12.8 | 113,408             | 7.2  | 210,437             | 21.7 |
| 36-39                          | 117,581     | 4.6  | 29,078              | 1.8  | 88,503              | 9.1  |
| 40-44                          | 28,196      | 1.1  | 5934                | 0.4  | 22,262              | 2.3  |
| Central birth cohort (year)    |             |      |                     |      |                     |      |
| 1961                           | 1005        | 0.0  | 398                 | 0.0  | 607                 | 0.1  |
| 1965                           | 11,243      | 0.4  | 4352                | 0.3  | 6891                | 0.7  |
| 1969                           | 59,906      | 2.4  | 23,893              | 1.5  | 36,013              | 3.7  |
| 1973                           | 210,013     | 8.3  | 99,342              | 6.3  | 110,671             | 11.4 |
| 1977                           | 397,173     | 15.7 | 223,259             | 14.3 | 173,914             | 17.9 |
| 1981                           | 597,747     | 23.6 | 359,770             | 23.0 | 237,977             | 24.6 |
| 1985                           | 627,824     | 24.8 | 403,415             | 25.8 | 224,409             | 23.1 |
| 1989                           | 448,517     | 17.7 | 311,007             | 19.9 | 137,510             | 14.2 |
| 1993                           | 155,741     | 6.1  | 118,241             | 7.5  | 37,500              | 3.9  |
| 1997                           | 25,831      | 1.0  | 22,315              | 1.4  | 3516                | 0.4  |
| Delivery modes                 |             |      |                     |      |                     |      |
| Vaginal delivery               | 1,551,045   | 61.2 | 929,981             | 59.4 | 621,064             | 64.1 |
| Cesarean delivery              | 983,955     | 38.8 | 636,011             | 40.6 | 347,944             | 35.9 |
| Newborn's sex                  |             |      |                     |      |                     |      |
| Male                           | 1,370,660   | 54.1 | 818,379             | 52.3 | 552,281             | 57.0 |
| Female                         | 1,164,340   | 45.9 | 747,613             | 47.7 | 416,727             | 43.0 |

**Supplementary Table 2** Analysis of deviance for Age-Period-Cohort models for preterm birth incidence, stratified by parity

| Models <sup>a</sup>    | Change in Residual Deviance (Degrees of Freedom) <sup>b</sup> |                |
|------------------------|---------------------------------------------------------------|----------------|
|                        | Primipara                                                     | Multipara      |
| Age                    |                                                               |                |
| Age-drift <sup>c</sup> | 68.3 (1)***                                                   | 0 (1)          |
| Age-Cohort             | 26.1 (4)***                                                   | 154.9 (3)***   |
| Age-Period-Cohort      | 3.1 (2)                                                       | 36.9 (1)***    |
| Age-Period             | -24.5 (-4)***                                                 | -186.7 (-3)*** |
| Age-drift <sup>c</sup> | -4.7 (-2)                                                     | -5 (-1)*       |

<sup>a</sup>Models are ordered so that adjacent rows provide tests between models, culminating in the age-period-cohort model.

<sup>b</sup>Changes in residual degree of freedom and deviance are used to perform a  $\chi^2$  test between adjacent models, where the fuller model is accepted if the test is significant.

<sup>c</sup>The age-drift model is the intersection of the age-period and the age-cohort models.

\* $P < 0.05$

\*\*\* $P < 0.001$

**Supplementary Table 3** Analysis of deviance for Age-Period-Cohort models for extremely or very preterm birth incidence, stratified by parity

| Models <sup>a</sup> | Change in Residual Deviance (Degrees of Freedom) <sup>b</sup> |               |
|---------------------|---------------------------------------------------------------|---------------|
|                     | Primipara                                                     | Multipara     |
| Age                 |                                                               |               |
| Age-drift           | 58.4 (1)***                                                   | 17.5 (1)***   |
| Age-Cohort          | 33.1 (4)***                                                   | 44.4 (3)***   |
| Age-Period-Cohort   | 30.1 (2)***                                                   | 19.6 (1)***   |
| Age-Period          | -43.4 (-4)***                                                 | -57.2 (-3)*** |
| Age-drift           | -19.8 (-2)***                                                 | -6.8 (-1)**   |

<sup>a</sup>Models are ordered so that adjacent rows provide tests between models, culminating in the age-period-cohort model.

<sup>b</sup>Changes in residual degree of freedom and deviance are used to perform a  $\chi^2$  test between adjacent models, where the fuller model is accepted if the test is significant.

\*\* $P < 0.01$

\*\*\* $P < 0.001$

A. Primiparous mothers

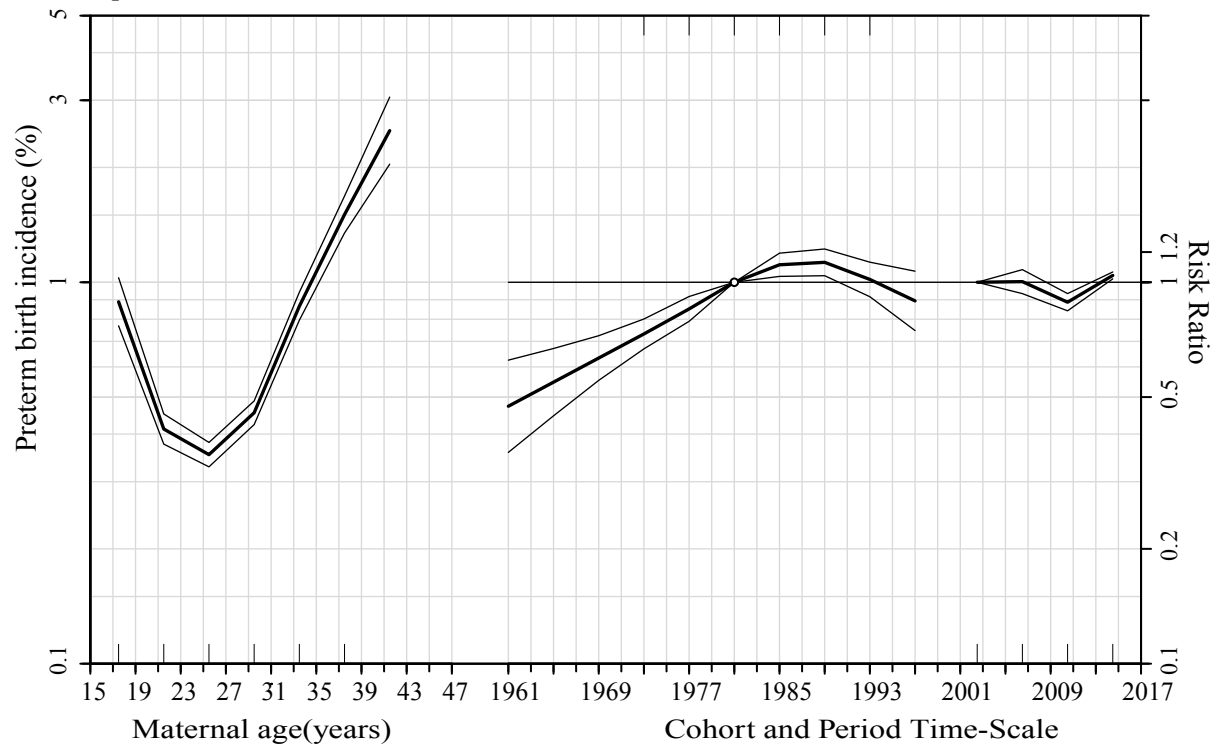

B. Multiparous mothers

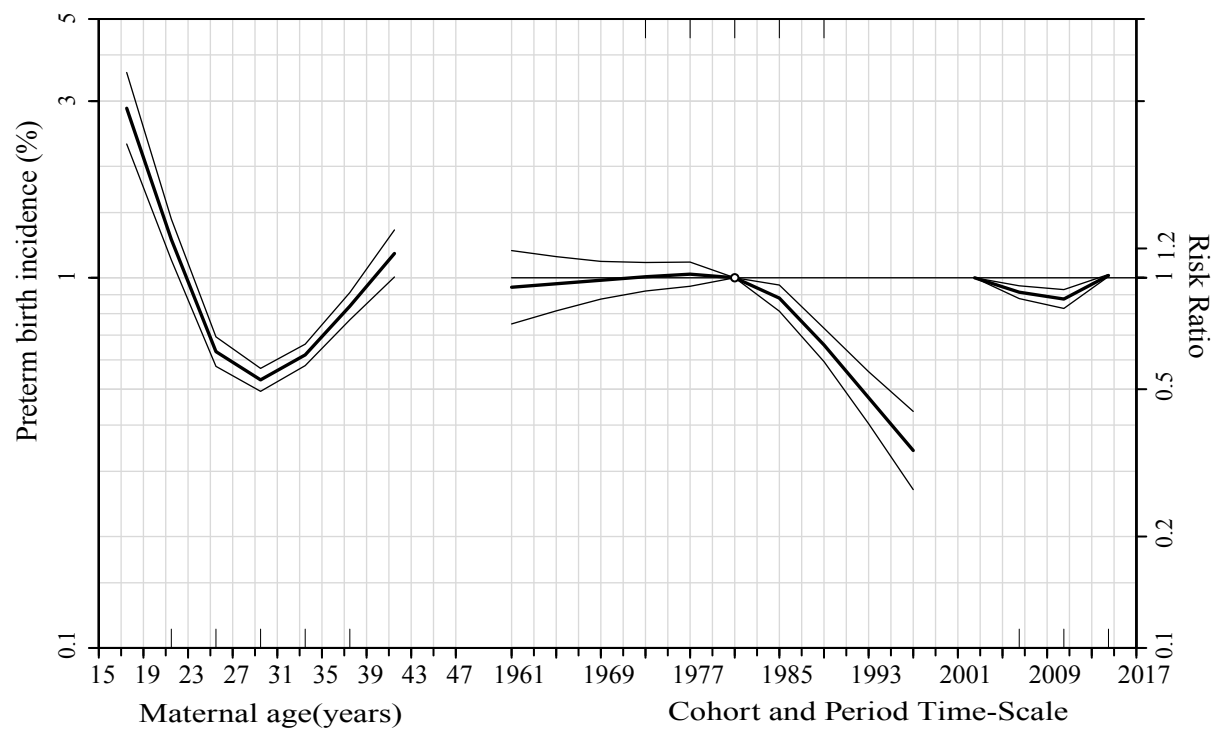

**Supplementary Fig.1** Age-period-cohort influences on trends in extremely or very preterm birth by parity in Guangzhou, China, from 2001 to 2016.

The left curve showed the fitted age-specific incidence at the reference cohort (1981), the middle curve was the risk ratios of cohorts relative to the reference cohort (1981), and the right curve was the risk ratios of period conditional on the estimated age and cohort effects.
